# Supplementary material
Source: publisher site journal article supplement (https://www.dovepress.com/article/438260)
Supplement: Supplementary file 1 [file get_supplementary_file.php]

**Supplementary Material**

**Supplementary Material 1:** The relationships between indicators and their latent variables -evaluation of the outer models

The final outer models were associated with good indicator reliability, internal consistency reliability, convergent validity, and discriminant validity. More specifically, **Supplementary** **Table 3** shows loadings of the final indicators for the three models. In the model of Change in Interference, Change in SF36-role physical was excluded due to a low loading (below 0.708). Because low loadings were also found for Change in CPAQ8-AE and Change in CPAQ8-PW as indicators of Change in Acceptance, Change in CPAQ-tot was used instead in the three models. After these revisions, indicator reliability was satisfactory (above the threshold of 0.708) for all finally included indicators in the three models. Both internal consistency reliability (rhoc) and convergent validity (AVE) were good for the three models (**Supplementary Table 1**). Discriminant validity (HTMT) was good for all construct combinations in the three models (**Supplementary Table 2**).

**Supplementary Table 1a:** OPLS regressions of the indicators of Change in Life control i.e., Change in MPI-control (left) and Change in SF36-social function(sf)(right). For a description of the different Indicators see Table 1. VIPpred and p(corr) are reported for each regressor (i.e., the loading of each indicator (variable) scaled as a correlation coefficient and therefore standardizing the range from −1 to +1). The sign of p(corr) indicates the direction of the correlation with the dependent variable. Indicators/variables with VIPpred>1.0 and │p(corr)│>0.40 are significant.

| Change in MPI control |  |  | Change in SF36-sf |  |  |
| --- | --- | --- | --- | --- | --- |
| Variables | VIPpred | p(corr) | Variables | VIPpred | p(corr) |
| diff-CPAQ pre vs. 12m FU | 2.38 | 0.82 | diff-CPAQ pre vs. 12m FU | 2.50 | 0.88 |
| MPI-distress T0 | 1.44 | 0.48 | diff-TSK pre vs. 12m FU | 1.68 | -0.59 |
| diff-TSK pre vs. 12m FU | 1.43 | -0.50 | diff-CPAQ-tot pre vs. post | 1.55 | 0.56 |
| diff-CPAQ-tot pre vs. post | 1.36 | 0.49 | SF36-mh-rev T0 | 0.99 | 0.34 |
| SF36-mh-rev T0 | 1.08 | 0.36 | diff-TSK pre vs. post | 0.96 | -0.34 |
| HAD-tot T0 | 0.99 | 0.33 | MPI-distress T0 | 0.88 | 0.30 |
| SF36-bp-rev T0 | 0.81 | 0.27 | SF36-bp-rev T0 | 0.86 | 0.29 |
| MPI-Pain severity T0 | 0.75 | 0.25 | CPAQ-tot T0 | 0.83 | -0.29 |
| CPAQ-tot T0 | 0.73 | -0.25 | HAD-tot T0 | 0.77 | 0.26 |
| SF36-re-rev T0 | 0.70 | 0.23 | SF36-re-rev T0 | 0.76 | 0.26 |
| diff-TSK pre vs. post | 0.61 | -0.22 | MPI-Pain severity T0 | 0.36 | 0.12 |
| NRS-7d T0 | 0.60 | 0.19 | Education level | 0.23 | 0.08 |
| Age | 0.42 | -0.15 | Age | 0.19 | -0.07 |
| Region of birth | 0.19 | -0.07 | Region of birth | 0.14 | -0.05 |
| TSK T0 | 0.18 | -0.06 | NRS-7d T0 | 0.08 | 0.02 |
| Education level | 0.09 | 0.03 | Sex/gender | 0.06 | -0.02 |
| Sex/gender | 0.09 | 0.03 | TSK T0 | 0.01 | 0.00 |
| R2 | 0.27 |  | R2 | 0.25 |  |
| Q2 | 0.25 |  | Q2 | 0.24 |  |
| CV-ANOVA P-value | <0.001 |  | CV-ANOVA P-value | <0.001 |  |

**Supplementary Table 1b:** OPLS regressions of the indicators of Change in Interference i.e., Change in MPI-Pain interference (left) and Change in SF36-physical function (pf)(right). For a description of the different Indicators see Table 1. VIPpred and p(corr) are reported for each regressor (i.e., the loading of each indicator (variable) scaled as a correlation coefficient and therefore standardizing the range from −1 to +1). The sign of p(corr) indicates the direction of the correlation with the dependent variable. Indicators/variables with VIPpred>1.0 and │p(corr)│>0.40 are significant.

| Change in MPI-Pain interfer |  |  | Change in SF36-pf |  |  |
| --- | --- | --- | --- | --- | --- |
| Variables | VIPpred | p(corr) | Variables | VIPpred | p(corr) |
| diff-CPAQ pre vs. 12m FU | 2.87 | 0.91 | diff-CPAQ pre vs. 12m FU | 2.67 | 0.89 |
| diff-CPAQ-tot pre vs. post | 1.89 | 0.62 | diff-TSK pre vs. 12m FU | 1.84 | -0.62 |
| diff-TSK pre vs. 12m FU | 1.76 | -0.57 | diff-CPAQ-tot pre vs. post | 1.80 | 0.61 |
| diff-TSK pre vs. post | 1.02 | -0.33 | diff-TSK pre vs. post | 1.07 | -0.36 |
| TSK T0 | 0.48 | -0.15 | SF36-bp-rev T0 | 0.69 | 0.22 |
| MPI-distress T0 | 0.47 | 0.13 | MPI-Pain severity T0 | 0.53 | 0.17 |
| CPAQ-tot T0 | 0.42 | -0.12 | CPAQ-tot T0 | 0.52 | -0.17 |
| SF36-bp-rev T0 | 0.34 | 0.09 | MPI-distress T0 | 0.41 | 0.12 |
| SF36-mh-rev T0 | 0.24 | 0.06 | NRS-7d T0 | 0.40 | 0.12 |
| Education level | 0.22 | 0.07 | Sex/gender | 0.39 | -0.13 |
| MPI-Pain severity T0 | 0.21 | 0.05 | Region of birth | 0.38 | -0.13 |
| HAD-tot T0 | 0.21 | 0.05 | Age | 0.35 | -0.12 |
| Region of birth | 0.17 | -0.06 | SF36-re-rev T0 | 0.31 | 0.09 |
| SF36-re-rev T0 | 0.14 | 0.03 | TSK T0 | 0.29 | -0.10 |
| Sex/gender | 0.12 | -0.04 | SF36-mh-rev T0 | 0.28 | 0.08 |
| NRS-7d T0 | 0.01 | -0.01 | Education level | 0.24 | 0.08 |
| Age | 0.00 | -0.01 | HAD-tot T0 | 0.05 | 0.01 |
| R2 | 0.39 |  | R2 | 0.20 |  |
| Q2 | 0.39 |  | Q2 | 0.19 |  |
| CV-ANOVA P-value | <0.001 |  | CV-ANOVA P-value | <0.001 |  |

**Supplementary Table 1c:** OPLS regressions of the indicators of Change in HRQoL i.e., Change in EQ5D-index(left), Change in EQ-VAS(middle) and Change in SF36-general health (gh) (right). For a description of the different Indicators see Table 1. VIPpred and p(corr) are reported for each regressor (i.e., the loading of each indicator (variable) scaled as a correlation coefficient and therefore standardizing the range from −1 to +1). The sign of p(corr) indicates the direction of the correlation with the dependent variable. Indicators/variables with VIPpred>1.0 and │p(corr)│>0.40 are significant.

| Change in EQ5D-index |  |  | Change in EQ-VAS |  |  | Change in SF36-gh |  |  |
| --- | --- | --- | --- | --- | --- | --- | --- | --- |
| Variables | VIPpred | p(corr) | Variables | VIPpred | p(corr) | Variables | VIPpred | p(corr) |
| diff-CPAQ pre vs. 12m FU | 2.19 | 0.78 | diff-CPAQ pre vs. 12m FU | 2.65 | 0.89 | diff-CPAQ pre vs. 12m FU | 2.74 | 0.85 |
| diff-TSK pre vs. 12m FU | 1.57 | -0.57 | diff-CPAQ-tot pre vs. post | 1.64 | 0.57 | diff-TSK pre vs. 12m FU | 2.21 | -0.69 |
| SF36-bp-rev T0 | 1.32 | 0.46 | diff-TSK pre vs. 12m FU | 1.58 | -0.54 | diff-CPAQ-tot pre vs. post | 1.47 | 0.47 |
| diff-CPAQ-tot pre vs. post | 1.30 | 0.48 | SF36-bp-rev T0 | 0.89 | 0.29 | diff-TSK pre vs. post | 1.08 | -0.35 |
| MPI-Pain severity T0 | 1.12 | 0.39 | diff-TSK pre vs. post | 0.86 | -0.30 | MPI-distress T0 | 0.51 | 0.13 |
| MPI-distress T0 | 1.00 | 0.35 | MPI-distress T0 | 0.84 | 0.27 | SF36-mh-rev T0 | 0.51 | 0.14 |
| diff-TSK pre vs. post | 0.96 | -0.35 | SF36-mh-rev T0 | 0.74 | 0.24 | SF36-re-rev T0 | 0.44 | 0.12 |
| NRS-7d T0 | 0.89 | 0.31 | CPAQ-tot T0 | 0.71 | -0.24 | Sex/gender | 0.43 | -0.14 |
| SF36-mh-rev T0 | 0.86 | 0.30 | MPI-Pain severity T0 | 0.62 | 0.20 | HAD-tot T0 | 0.37 | 0.09 |
| HAD-tot T0 | 0.72 | 0.25 | HAD-tot T0 | 0.59 | 0.19 | TSK T0 | 0.31 | -0.10 |
| CPAQ-tot T0 | 0.68 | -0.24 | NRS-7d T0 | 0.51 | 0.16 | Region of birth | 0.23 | -0.08 |
| SF36-re-rev T0 | 0.66 | 0.23 | SF36-re-rev T0 | 0.39 | 0.13 | Education level | 0.21 | 0.07 |
| Age | 0.32 | -0.12 | Age | 0.29 | -0.10 | SF36-bp-rev T0 | 0.19 | 0.04 |
| Education level | 0.23 | 0.08 | Education level | 0.28 | 0.10 | CPAQ-tot T0 | 0.18 | -0.05 |
| TSK T0 | 0.07 | 0.02 | TSK T0 | 0.28 | -0.10 | Age | 0.15 | -0.05 |
| Sex/gender | 0.05 | 0.02 | Region of birth | 0.22 | -0.08 | MPI-Pain severity T0 | 0.10 | 0.01 |
| Region of birth | 0.04 | -0.02 | Sex/gender | 0.14 | -0.05 | NRS-7d T0 | 0.04 | -0.01 |
| R2 | 0.17 |  | R2 | 0.16 |  | R2 | 0.23 |  |
| Q2 | 0.16 |  | Q2 | 0.15 |  | Q2 | 0.22 |  |
| CV-ANOVA P-value | <0.001 |  | CV-ANOVA P-value | <0.001 |  | CV-ANOVA P-value | <0.001 |  |

**Supplementary Table 2.** Internal consistency reliability (rho-c) and Convergent validity (AVE).

| ***Constructs*** | ***Internal consistency  reliability rhoc*** | ***Convergent  validity AVE*** |
| --- | --- | --- |
| **Change in Interference** |  |  |
| Pain Intensity T0 | 0.901 | 0.752 |
| Psychological distress T0 | 0.907 | 0.711 |
| Acceptance T0 | 0.819 | 0.695 |
| Change in Acceptance | 0.871 | 0.773 |
| Change in Fear-avoidance | 0.879 | 0.784 |
| Change in Interference | 0.846 | 0.734 |
| **Change in Life control** |  |  |
| Pain Intensity T0 | 0.901 | 0.752 |
| Psychological distress T0 | 0.907 | 0.712 |
| Acceptance T0 | 0.819 | 0.695 |
| Change in Acceptance | 0.868 | 0.769 |
| Change in Fear-avoidance | 0.878 | 0.784 |
| Change in Life Control | 0.844 | 0.730 |
| **Change in HRQoL** |  |  |
| Pain Intensity T0 | 0.901 | 0.752 |
| Psychological distress T0 | 0.907 | 0.711 |
| Acceptance T0 | 0.819 | 0.695 |
| Change in Acceptance | 0.867 | 0.767 |
| Change in Fear-avoidance | 0.878 | 0.784 |
| Change in HrQoL | 0.805 | 0.578 |

T0 = baseline; HRQoL **=** health-related quality of life

**Supplementary Table 3.** Discriminant validity according to the Heterotrait-monotrait ratio (HTMT) for the three analyses.

| **Change in Interference** | HTMT | **Change in Life control** | HTMT | **Change in HrQoL** | HTMT |
| --- | --- | --- | --- | --- | --- |
| Change in Interference <-> Acceptance T0 | 0.108 | Change in Life Control <-> Acceptance T0 | 0.239 | Change in HrQoL <-> Acceptance T0 | 0.134 |
| Fear-avoidance T0 <-> Acceptance T0 | 0.662 | Fear-avoidance T0 <-> Acceptance T0 | 0.662 | Fear-avoidance T0 <-> Acceptance T0 | 0.662 |
| Fear-avoidance T0 <-> Change in Interference | 0.034 | Fear-avoidance T0 <-> Change in Life Control | 0.045 | Fear-avoidance T0 <-> Change in HrQoL | 0.029 |
| Pain Intensity T0 <-> Acceptance T0 | 0.561 | Pain Intensity T0 <-> Acceptance T0 | 0.561 | Pain Intensity T0 <-> Acceptance T0 | 0.561 |
| Pain Intensity T0 <-> Change in Interference | 0.094 | Pain Intensity T0 <-> Change in Life Control | 0.173 | Pain Intensity T0 <-> Change in HrQoL | 0.164 |
| Pain Intensity T0 <-> Fear-avoidance T0 | 0.314 | Pain Intensity T0 <-> Fear-avoidance T0 | 0.314 | Pain Intensity T0 <-> Fear-avoidance T0 | 0.314 |
| Psychological distress T0 <-> Acceptance T0 | 0.687 | Psychological distress T0 <-> Acceptance T0 | 0.687 | Psychological distress T0 <-> Acceptance T0 | 0.687 |
| Psychological distress T0 <-> Change in Interference | 0.082 | Psychological distress T0 <-> Change in Life Control | 0.298 | Psychological distress T0 <-> Change in HrQoL | 0.185 |
| Psychological distress T0 <-> Fear-avoidance T0 | 0.392 | Psychological distress T0 <-> Fear-avoidance T0 | 0.392 | Psychological distress T0 <-> Fear-avoidance T0 | 0.392 |
| Psychological distress T0 <-> Pain Intensity T0 | 0.453 | Psychological distress T0 <-> Pain Intensity T0 | 0.453 | Psychological distress T0 <-> Pain Intensity T0 | 0.453 |
| Change in Acceptance <-> Acceptance T0 | 0.632 | Change in Acceptance <-> Acceptance T0 | 0.632 | Change in Acceptance <-> Acceptance T0 | 0.632 |
| Change in Acceptance <-> Change in Interference | 0.735 | Change in Acceptance <-> Change in Life Control | 0.629 | Change in Acceptance <-> Change in HrQoL | 0.589 |
| Change in Acceptance <-> Fear-avoidance T0 | 0.039 | Change in Acceptance <-> Fear-avoidance T0 | 0.039 | Change in Acceptance <-> Fear-avoidance T0 | 0.039 |
| Change in Acceptance <-> Pain Intensity T0 | 0.085 | Change in Acceptance <-> Pain Intensity T0 | 0.085 | Change in Acceptance <-> Pain Intensity T0 | 0.085 |
| Change in Acceptance <-> Psychological distress T0 | 0.147 | Change in Acceptance <-> Psychological distress T0 | 0.147 | Change in Acceptance <-> Psychological distress T0 | 0.147 |
| Change in Fear-avoidance <-> Acceptance T0 | 0.268 | Change in Fear-avoidance <-> Acceptance T0 | 0.268 | Change in Fear-avoidance <-> Acceptance T0 | 0.268 |
| Change in Fear-avoidance <-> Change in Interference | 0.504 | Change in Fear-avoidance <-> Change in Life Control | 0.443 | Change in Fear-avoidance <-> Change in HrQoL | 0.460 |
| Change in Fear-avoidance <-> Fear-avoidance T0 | 0.514 | Change in Fear-avoidance <-> Fear-avoidance T0 | 0.514 | Change in Fear-avoidance <-> Fear-avoidance T0 | 0.514 |
| Change in Fear-avoidance <-> Pain Intensity T0 | 0.049 | Change in Fear-avoidance <-> Pain Intensity T0 | 0.049 | Change in Fear-avoidance <-> Pain Intensity T0 | 0.049 |
| Change in Fear-avoidance <-> Psychological distress T0 | 0.109 | Change in Fear-avoidance <-> Psychological distress T0 | 0.109 | Change in Fear-avoidance <-> Psychological distress T0 | 0.109 |
| Change in Fear-avoidance <-> Change in Acceptance | 0.627 | Change in Fear-avoidance <-> Change in Acceptance | 0.627 | Change in Fear-avoidance <-> Change in Acceptance | 0.627 |

T0 = baseline; HRQoL **=** health-related quality of life

**Supplementary Table 4**. Loadings for the three models analysed.

| ***Model*** |  | ***Change in Interference*** | ***Change in  Life Control*** | ***Change in HRQoL*** |
| --- | --- | --- | --- | --- |
| ***Latent variable*** | ***Indicator*** | ***Loading*** | ***Loading*** | ***Loading*** |
| Pain intensity T0 | NRS-7d T0 | 0.833 | 0.831 | 0.833 |
| Pain intensity T0 | MPI-Pain severity T0 | 0.913 | 0.912 | 0.912 |
| Pain intensity T0 | SF36-bodily pain-rev T0 | 0.854 | 0.857 | 0.855 |
| Psychological Distress T0 | HAD-tot T0 | 0.891 | 0.890 | 0.891 |
| Psychological Distress T0 | MPI-Distress T0 | 0.832 | 0.836 | 0.832 |
| Psychological Distress T0 | SF36-mental health-rev T0 | 0.905 | 0.905 | 0.906 |
| Psychological Distress T0 | SF36-role emotional-rev T0 | 0.734 | 0.733 | 0.734 |
| Fear-avoidance T0 | TSK T0 | 1.000 | 1.000 | 1.000 |
| Change in Fear-avoidance | Change in TSK- pre vs. post | 0.830 | 0.827 | 0.827 |
| Change in Fear-avoidance | Change in TSK-pre vs. 12m | 0.938 | 0.940 | 0.940 |
| Acceptance T0 | CPAQ8-AE T0 | 0.891 | 0.889 | 0.891 |
| Acceptance T0 | CPAQ8-PW T0 | 0.772 | 0.774 | 0.772 |
| Change in Acceptance | Change in CPAQ8-tot-pre vs. post | 0.809 | 0.794 | 0.788 |
| Change in Acceptance | Change in CPAQ8-tot-pre vs. 12m | 0.944 | 0.952 | 0.955 |
| Change in Interference | Change in MPI-Pain interfer | 0.905 | NA | NA |
| Change in Interference | Change in SF36-physical function | 0.805 | NA | NA |
| Change in Life Control | Change in MPI-Control | NA | 0.857 | NA |
| Change in Life Control | Change in SF36-social function | NA | 0.852 | NA |
| Change in HrQoL | Change in EQ-VAS | NA | NA | 0.768 |
| Change in HrQoL | Change in EQ5Dindex | NA | NA | 0.744 |
| Change in HrQoL | Change in SF36-general health | NA | NA | 0.769 |

-rev = variable revised to indicate a troublesome situation; For details of calculation of changes see Table 1. T0 = baseline; HRQoL = health-related quality of life; NRS-7d = Pain intensity according to a numeric rating scale; HAD = The Hospital Anxiety and Depression Scale; HAD-tot = sum of the two subscales of HAD; MPI = Multidimensional Pain Inventory; SF36 = Short Form Health Survey (SF36): the following scales were included – physical function, role physical, social function, mental health, and role emotional; TSK = Tampa Scale for Kinesiophobia; CPAQ = Chronic Pain Acceptance Questionnaire 8-item version; CPAQ8-AE = activity engagement subscale of CPAQ; CPAQ-PW PA = pain willingness subscale of CPAQ; physical activity level; PRI = Pain region Index; EQ-5Dindex = European Quality of Life instrument – index; EQ-VAS = health scale of European Quality of Life instrument. NA= not applicable (i.e., this variable was not included in the model)

**Supplementary Table 5**. The coefficients of determination (R2) for the relevant constructs.

| **Change in Interference** | ***Mean*** | ***SD*** | ***T statistics*** | ***P values*** | ***95% CI low*** | ***95% CI high*** |
| --- | --- | --- | --- | --- | --- | --- |
| Acceptance T0 | 0.299 | 0.018 | 16.894 | <0.001 | 0.266 | 0.334 |
| Fear-avoidance T0 | 0.160 | 0.015 | 10.339 | <0.001 | 0.131 | 0.191 |
| Change in Acceptance | 0.014 | 0.005 | 2.546 | 0.011 | 0.006 | 0.026 |
| Change in Fear-avoidance | 0.008 | 0.004 | 1.804 | 0.071 | 0.002 | 0.018 |
| Change in Interference | 0.368 | 0.017 | 21.813 | <0.001 | 0.334 | 0.399 |
| **Change in Life control** |  |  |  |  |  |  |
| Acceptance T0 | 0.299 | 0.018 | 16.839 | <0.001 | 0.265 | 0.333 |
| Fear-avoidance T0 | 0.160 | 0.015 | 10.293 | <0.001 | 0.130 | 0.190 |
| Change in Acceptance | 0.014 | 0.005 | 2.516 | 0.012 | 0.005 | 0.026 |
| Change in Fear-avoidance | 0.008 | 0.004 | 1.791 | 0.073 | 0.002 | 0.018 |
| Change in Life Control | 0.292 | 0.017 | 17.433 | <0.001 | 0.259 | 0.326 |
| **Change in HRQoL** |  |  |  |  |  |  |
| Acceptance T0 | 0.299 | 0.018 | 16.881 | <0.001 | 0.266 | 0.334 |
| Fear-avoidance T0 | 0.160 | 0.015 | 10.331 | <0.001 | 0.131 | 0.191 |
| Change in Acceptance | 0.014 | 0.005 | 2.504 | 0.012 | 0.005 | 0.026 |
| Change in Fear-avoidance | 0.008 | 0.004 | 1.796 | 0.073 | 0.002 | 0.018 |
| Change in HRQoL | 0.272 | 0.018 | 15.052 | <0.001 | 0.237 | 0.309 |

T0 = baseline; HRQoL **=** health-related quality of life

**Supplementary Table 6.** Prediction power (Q²predict) in the three analyses**.**

| **Change in Interference** | ***Q²predict*** | **Change in Life control** | ***Q²predict*** | **Change in HrQoL** | ***Q²predict*** |
| --- | --- | --- | --- | --- | --- |
| Acceptance T0 | 0.296 | Acceptance T0 | 0.296 | Acceptance T0 | 0.296 |
| Fear-avoidance T0 | 0.158 | Fear-avoidance T0 | 0.158 | Fear-avoidance T0 | 0.158 |
| Change in Acceptance | 0.011 | Change in Acceptance | 0.011 | Change in Acceptance | 0.010 |
| Change in Fear-avoidance | 0.005 | Change in Fear-avoidance | 0.005 | Change in Fear-avoidance | 0.005 |
| Change in Interference | 0.003 | Change in Life Control | 0.049 | Change in HrQoL | 0.021 |

T0 = baseline; HRQoL = health-related quality of life

**Supplementary Table 7.** Effects sizes according to f2 in the three analyses**.**

| **Change in Interference** | Mean | SD | T statistics | P values | 95% CI low | 95% CI high |
| --- | --- | --- | --- | --- | --- | --- |
| Pain Intensity T0 -> Change in Interference | 0.012 | 0.005 | 2.283 | 0.022 | 0.004 | 0.024 |
| Psychological distress T0 -> Change in Interference | 0.008 | 0.004 | 1.752 | 0.080 | 0.002 | 0.017 |
| Acceptance T0 -> Change in Interference | 0.038 | 0.009 | 4.123 | <0.001 | 0.022 | 0.058 |
| Fear-avoidance T0 -> Change in Interference | 0.003 | 0.003 | 1.135 | 0.257 | 0.000 | 0.010 |
| Change in Acceptance -> Change in Interference | 0.251 | 0.025 | 10.102 | <0.001 | 0.205 | 0.301 |
| Change in Fear-avoidance -> Change in Interference | 0.025 | 0.007 | 3.352 | 0.001 | 0.012 | 0.040 |
| Pain Intensity T0 -> Acceptance T0 | 0.083 | 0.013 | 6.208 | <0.001 | 0.060 | 0.111 |
| Psychological distress T0 -> Acceptance T0 | 0.184 | 0.022 | 8.431 | <0.001 | 0.143 | 0.227 |
| Pain Intensity T0 -> Fear-avoidance T0 | 0.031 | 0.008 | 3.824 | <0.001 | 0.017 | 0.048 |
| Psychological distress T0 -> Fear-avoidance T0 | 0.090 | 0.014 | 6.355 | <0.001 | 0.064 | 0.120 |
| Pain Intensity T0 -> Change in Acceptance | 0.001 | 0.001 | 0.433 | 0.665 | 0.000 | 0.005 |
| Psychological distress T0 -> Change in Acceptance | 0.010 | 0.005 | 2.053 | 0.040 | 0.002 | 0.020 |
| Pain Intensity T0 -> Change in Fear-avoidance | 0.001 | 0.001 | 0.114 | 0.909 | 0.000 | 0.003 |
| Psychological distress T0 -> Change in Fear-avoidance | 0.006 | 0.004 | 1.576 | 0.115 | 0.001 | 0.015 |
| **Change in Life control** |  |  |  |  |  |  |
| Pain Intensity T0 -> Change in Life Control | 0.011 | 0.005 | 2.175 | 0.030 | 0.003 | 0.023 |
| Psychological distress T0 -> Change in Life Control | 0.052 | 0.011 | 4.835 | <0.001 | 0.033 | 0.075 |
| Acceptance T0 -> Change in Life Control | 0.020 | 0.007 | 2.937 | 0.003 | 0.009 | 0.035 |
| Fear-avoidance T0 -> Change in Life Control | 0.004 | 0.003 | 1.155 | 0.248 | 0.000 | 0.010 |
| Change in Acceptance -> Change in Life Control | 0.141 | 0.018 | 7.802 | <0.001 | 0.107 | 0.178 |
| Change in Fear-avoidance -> Change in Life Control | 0.018 | 0.006 | 2.683 | 0.007 | 0.007 | 0.032 |
| Pain Intensity T0 -> Acceptance T0 | 0.083 | 0.013 | 6.191 | <0.001 | 0.059 | 0.111 |
| Psychological distress T0 -> Acceptance T0 | 0.182 | 0.022 | 8.391 | <0.001 | 0.142 | 0.226 |
| Pain Intensity T0 -> Fear-avoidance T0 | 0.031 | 0.008 | 3.806 | <0.001 | 0.017 | 0.048 |
| Psychological distress T0 -> Fear-avoidance T0 | 0.090 | 0.014 | 6.328 | <0.001 | 0.064 | 0.119 |
| Pain Intensity T0 -> Change in Acceptance | 0.001 | 0.001 | 0.428 | 0.668 | 0.000 | 0.005 |
| Psychological distress T0 -> Change in Acceptance | 0.010 | 0.005 | 2.031 | 0.042 | 0.002 | 0.020 |
| Pain Intensity T0 -> Change in Fear-avoidance | 0.001 | 0.001 | 0.116 | 0.908 | 0.000 | 0.003 |
| Psychological distress T0 -> Change in Fear-avoidance | 0.006 | 0.004 | 1.564 | 0.118 | 0.001 | 0.015 |
| **Change in HrQoL** |  |  |  |  |  |  |
| Pain Intensity T0 -> Change in HrQoL | 0.019 | 0.006 | 2.918 | 0.004 | 0.008 | 0.033 |
| Psychological distress T0 -> Change in HrQoL | 0.022 | 0.007 | 3.241 | 0.001 | 0.010 | 0.036 |
| Acceptance T0 -> Change in HrQoL | 0.029 | 0.008 | 3.560 | <0.001 | 0.015 | 0.045 |
| Fear-avoidance T0 -> Change in HrQoL | 0.003 | 0.002 | 1.112 | 0.266 | 0.000 | 0.009 |
| Change in Acceptance -> Change in HrQoL | 0.129 | 0.017 | 7.366 | <0.001 | 0.097 | 0.165 |
| Change in Fear-avoidance -> Change in HrQoL | 0.025 | 0.007 | 3.309 | 0.001 | 0.013 | 0.041 |
| Pain Intensity T0 -> Acceptance T0 | 0.083 | 0.013 | 6.200 | <0.001 | 0.060 | 0.111 |
| Psychological distress T0 -> Acceptance T0 | 0.183 | 0.022 | 8.425 | <0.001 | 0.143 | 0.227 |
| Pain Intensity T0 -> Fear-avoidance T0 | 0.031 | 0.008 | 3.818 | <0.001 | 0.017 | 0.048 |
| Psychological distress T0 -> Fear-avoidance T0 | 0.090 | 0.014 | 6.353 | <0.001 | 0.064 | 0.120 |
| Pain Intensity T0 -> Change in Acceptance | 0.001 | 0.001 | 0.418 | 0.676 | 0.000 | 0.005 |
| Psychological distress T0 -> Change in Acceptance | 0.010 | 0.004 | 2.030 | 0.042 | 0.002 | 0.020 |
| Pain Intensity T0 -> Change in Fear-avoidance | 0.001 | 0.001 | 0.114 | 0.910 | 0.000 | 0.003 |
| Psychological distress T0 -> Change in Fear-avoidance | 0.006 | 0.004 | 1.571 | 0.116 | 0.001 | 0.015 |

T0 = baseline; HRQoL **=** health-related quality of life

**Supplementary Figure 1**

| 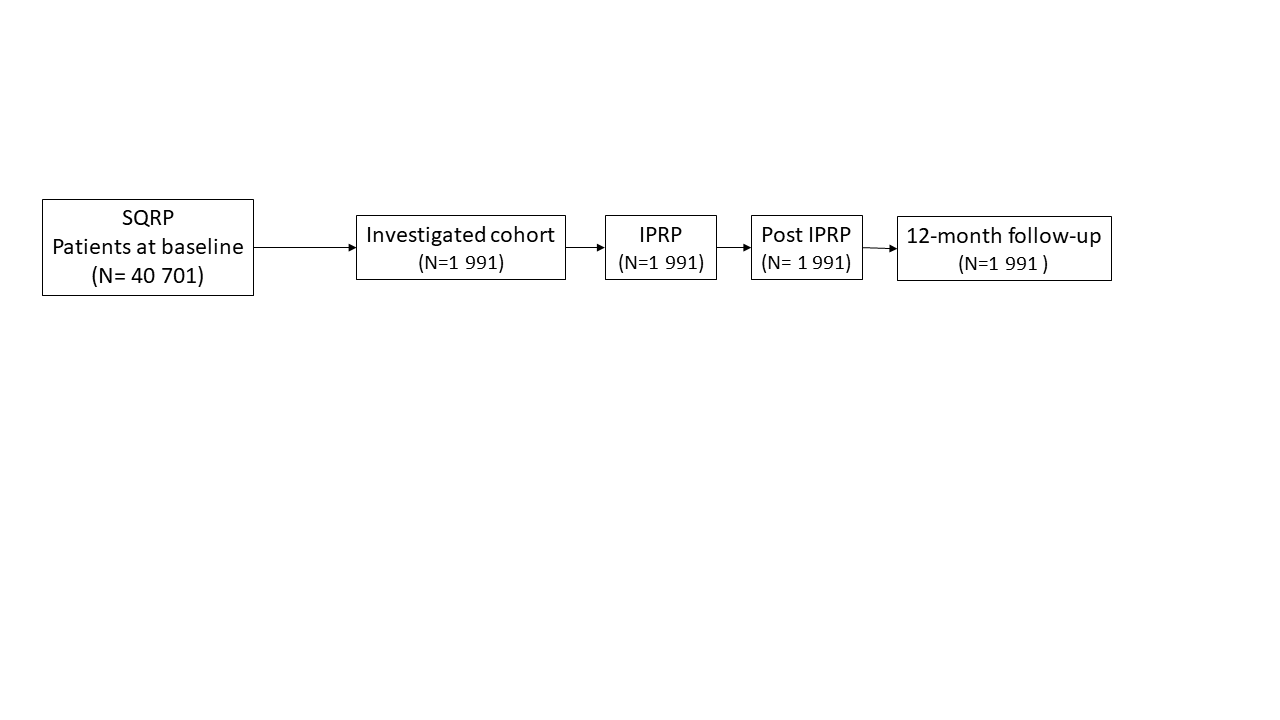 |
| --- |
| **Supplementary Figure 1**: Flow chart. The requirements for the investigated cohort are described in the section: Subjects and the Swedish Quality registry for pain rehabilitation (SQRP) in Subjects and Methods. . SQRP: Swedish Quality Registry for Pain Rehabilitation; IPRP: Interdisciplinary Pain Rehabilitation Program |
